# Supplementary material for: Metabolomics approach reveals metabolic disorders and potential biomarkers associated with the developmental toxicity of tetrabromobisphenol A and tetrachlorobisphenol A
Source: PubMed Central journal article supplement (PMC5062249; doi:10.1038/srep35257), 2016-10-13
Supplement: srep35257-s1.pdf [file srep35257-s1.pdf]

Supplementary information for

**Metabolomics approach reveals metabolic disorders and potential biomarkers associated with the developmental toxicity of tetrabromobisphenol A and tetrachlorobisphenol A**

Guozhu Ye<sup>1,#</sup>, Yajie Chen<sup>1,2,#</sup>, Hong-ou Wang<sup>1,2,#</sup>, Ting Ye<sup>1,2</sup>, Yi Lin<sup>1</sup>, Qiansheng Huang<sup>1</sup>, Yulang Chi<sup>1</sup>, Sijun Dong<sup>1,\*</sup>

<sup>1</sup>Key Laboratory of Urban Environment and Health, Institute of Urban Environment, Chinese Academy of Sciences, Xiamen 361021, China

<sup>2</sup>University of Chinese Academy of Sciences, Beijing 100049, China

\*Corresponding Authors

Tel: +86-592-6190-779, fax: +86-592-6190-566, e-mail: [sjdong@iue.ac.cn](mailto:sjdong@iue.ac.cn)

<sup>#</sup>These authors contributed equally to this work.

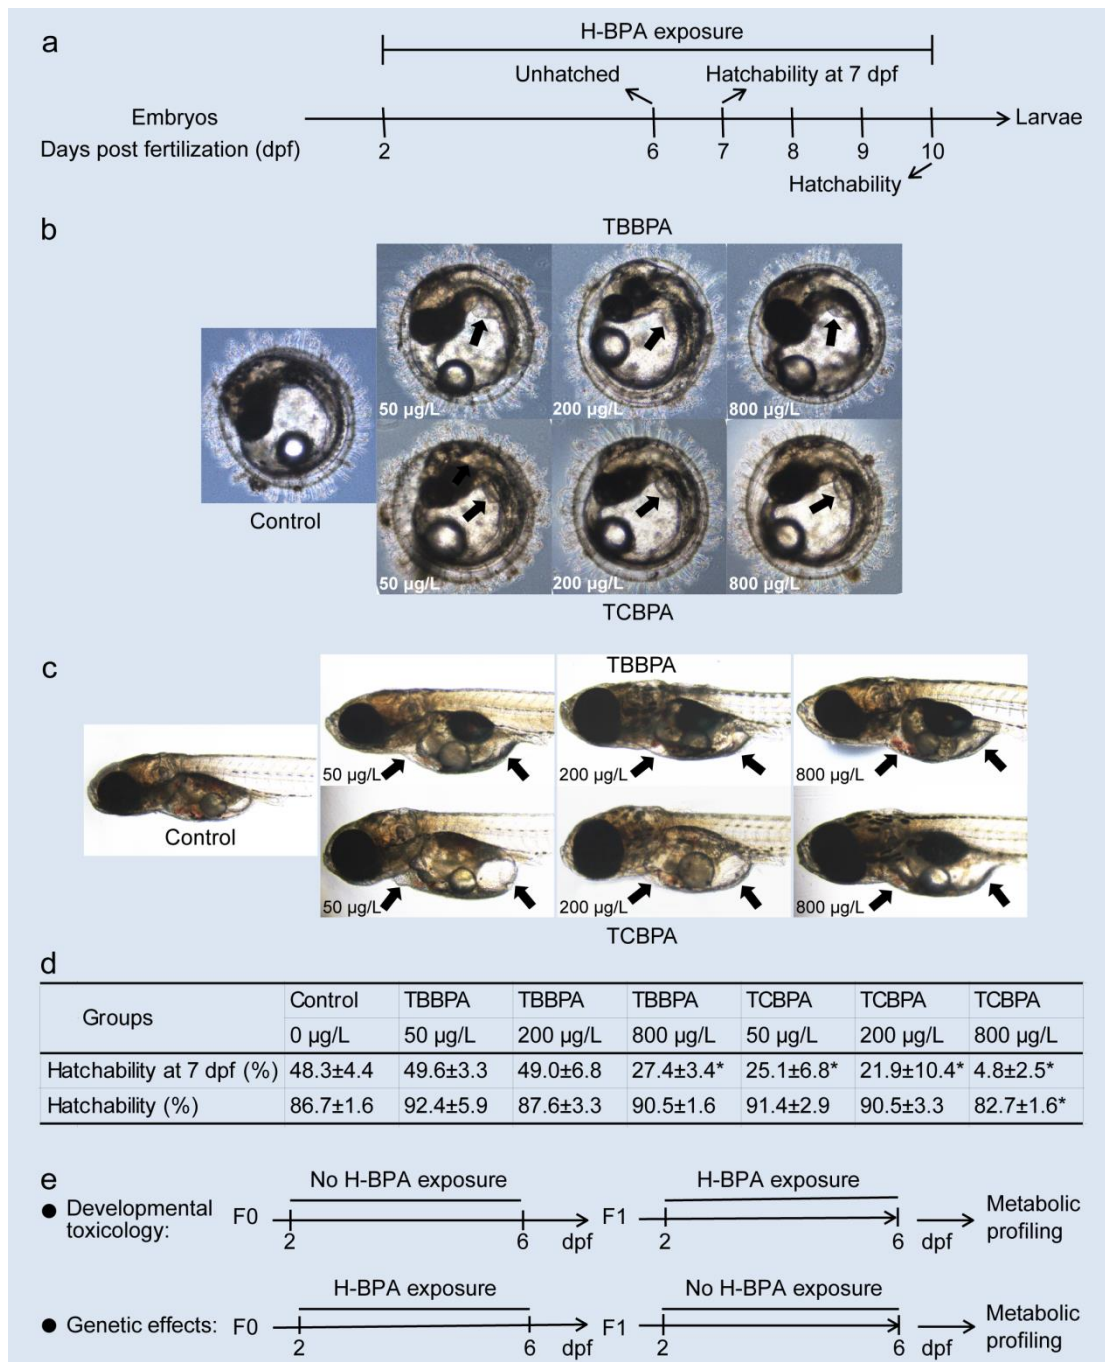

**Figure S1.** Experimental designs and morphological changes related to the developmental toxicity of H-BPA in *O. melastigma* embryos. **(a)** Experimental designs for embryonic exposure to H-BPA. **(b)** Morphological changes in embryos in response to H-BPA exposure. **(c)** Morphological changes in larvae in response to H-BPA exposure. **(d)** Changes in the hatchability in response to H-BPA exposure. **(e)** Experimental designs for discovering the developmental toxicology and related genetic effects of H-BPA using the metabolomics analysis.

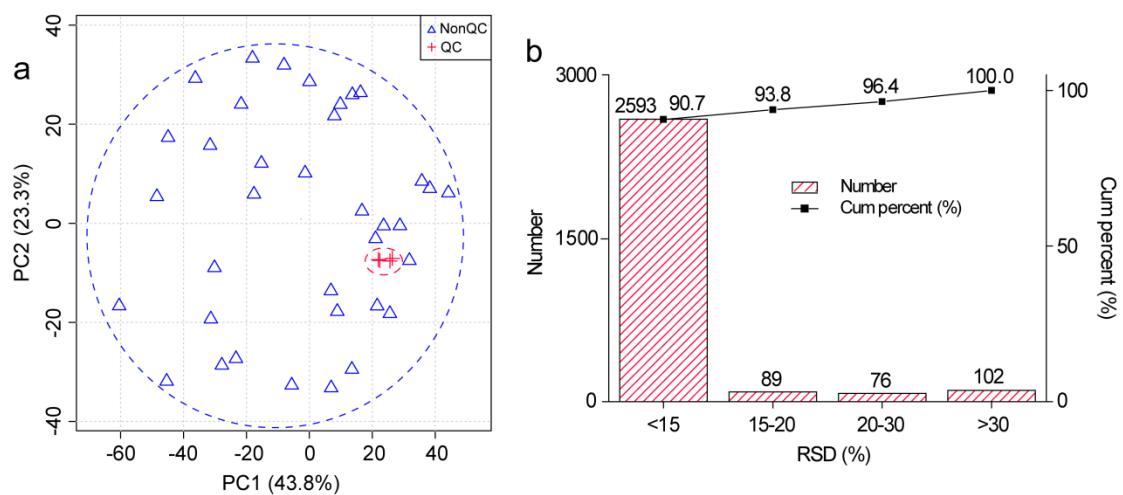

**Figure S2.** Analytical performance of metabolic profiling. **(a)** PCA score plot of the samples. **(b)**

Distribution of RSDs (relative standard deviations) of the metabolites in QC samples.

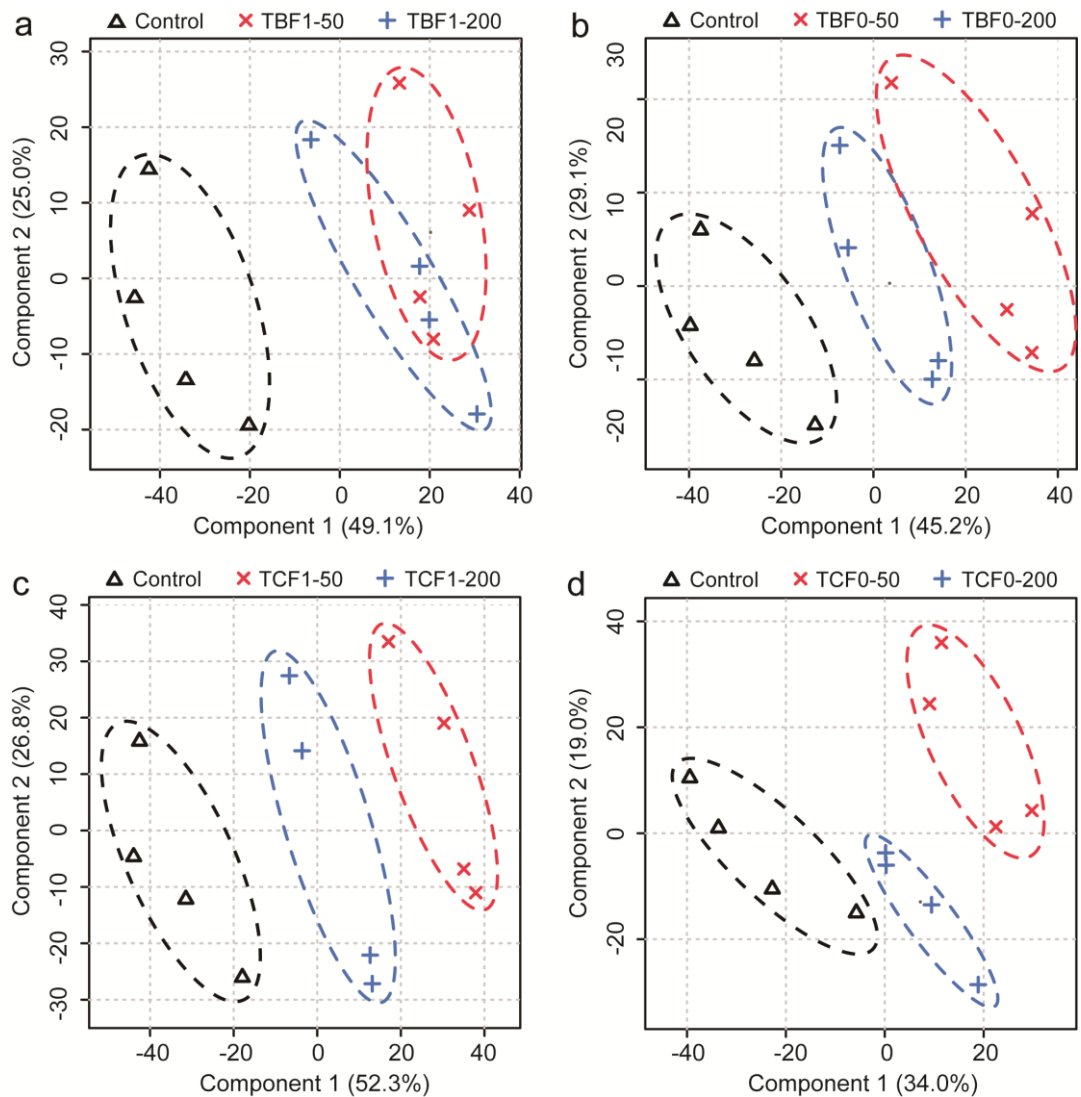

**Figure S3.** Evaluation of changes in metabolic profiling of *O. melastigma* embryos in response to H-BPA exposure using PLS-DA score plot. **(a)** Changes in metabolic profiling of TBF1 embryos (F0, not exposed to H-BPA; F1, exposed to 50 and 200  $\mu\text{g/L}$  TBBPA, respectively). **(b)** Changes in metabolic profiling of TBF0 embryos (F0, exposed to 50 and 200  $\mu\text{g/L}$  TBBPA, respectively; F1, not exposed to H-BPA). **(c)** Changes in metabolic profiling of TCF1 embryos (F0, not exposed to H-BPA; F1, exposed to 50 and 200  $\mu\text{g/L}$  TCBPA, respectively). **(d)** Changes in metabolic profiling of TCF0 embryos (F0, exposed to 50 and 200  $\mu\text{g/L}$  TCBPA, respectively; F1, not exposed to H-BPA).

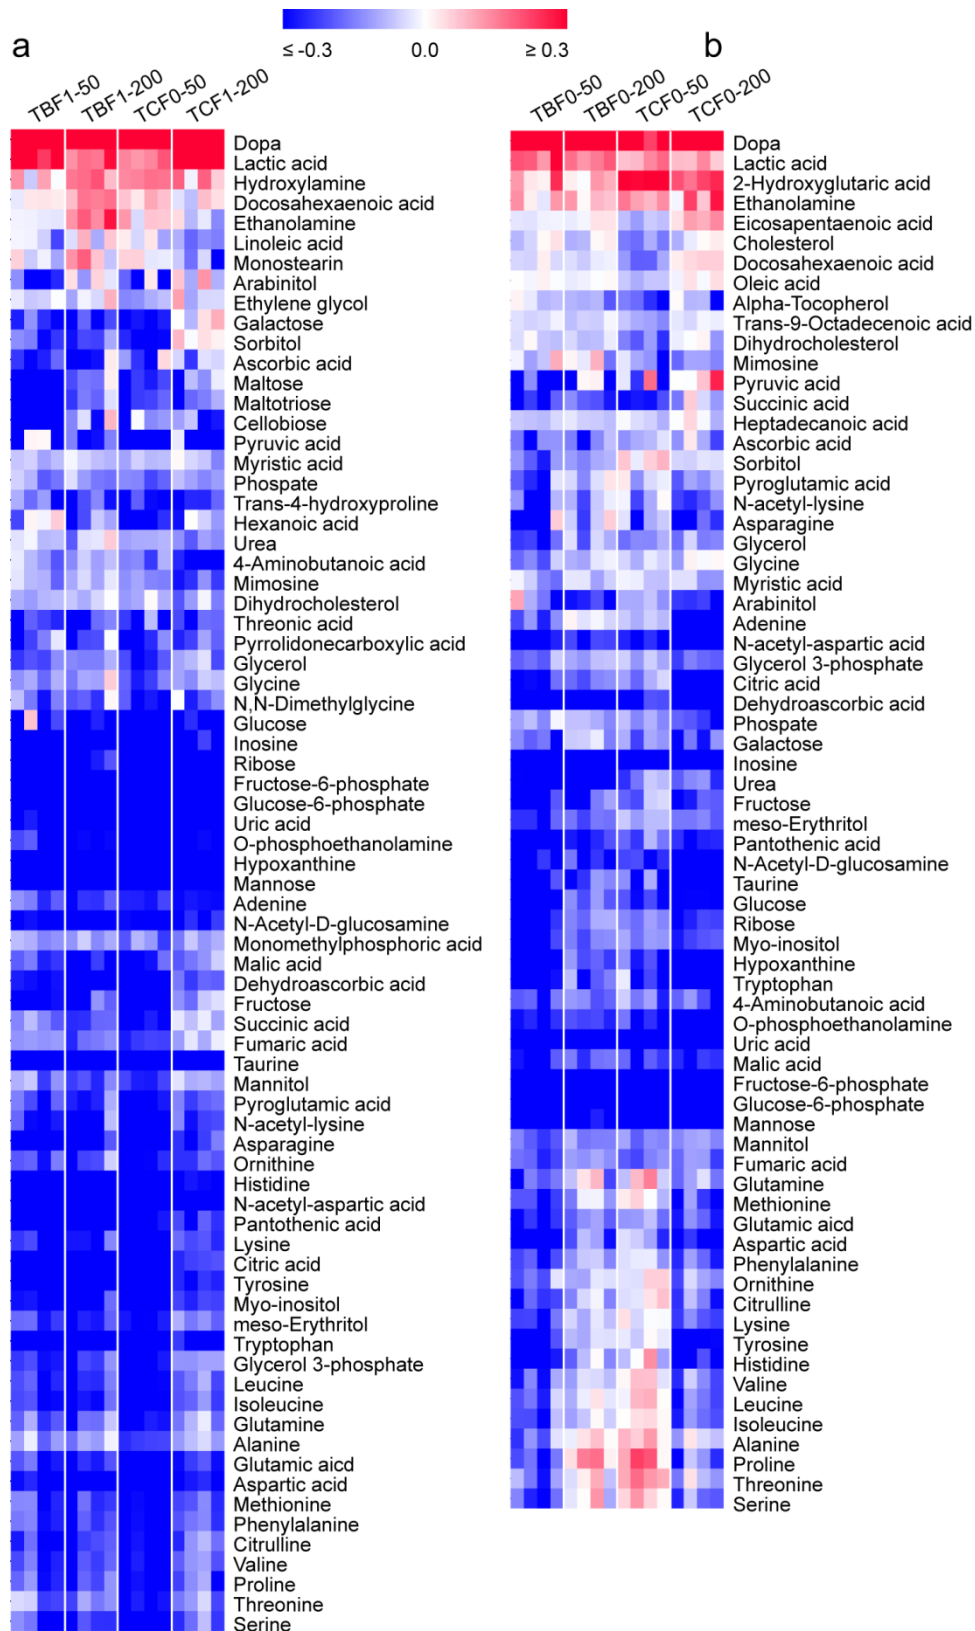

**Figure S4.** Changes in differential metabolites in response to H-BPA exposure using heat map. The differential metabolites had  $p$  values below 0.05 in at least one of the comparisons between the control

and treatment groups ( $n = 4$ , two-tailed Mann-Whitney U test). Ratios of the metabolite levels in the treatment groups to the average level in the control group were first obtained, and then changes in differential metabolites were represented as  $\log_{10}^{(\text{ratio})}$ , which were used for heat map plot. Red color indicates that metabolite levels in treatment groups are higher than the average level in the control group, whereas blue color indicates that metabolite levels in the treatment groups are lower than the average level in the control group. **(a)** Metabolites significantly changed ( $p < 0.05$ ) in offspring embryos resulting from TBBPA and TCBPA exposure. **(b)** Metabolites significantly changed ( $p < 0.05$ ) in offspring embryos resulting from parental embryonic exposure to TBBPA and TCBPA.

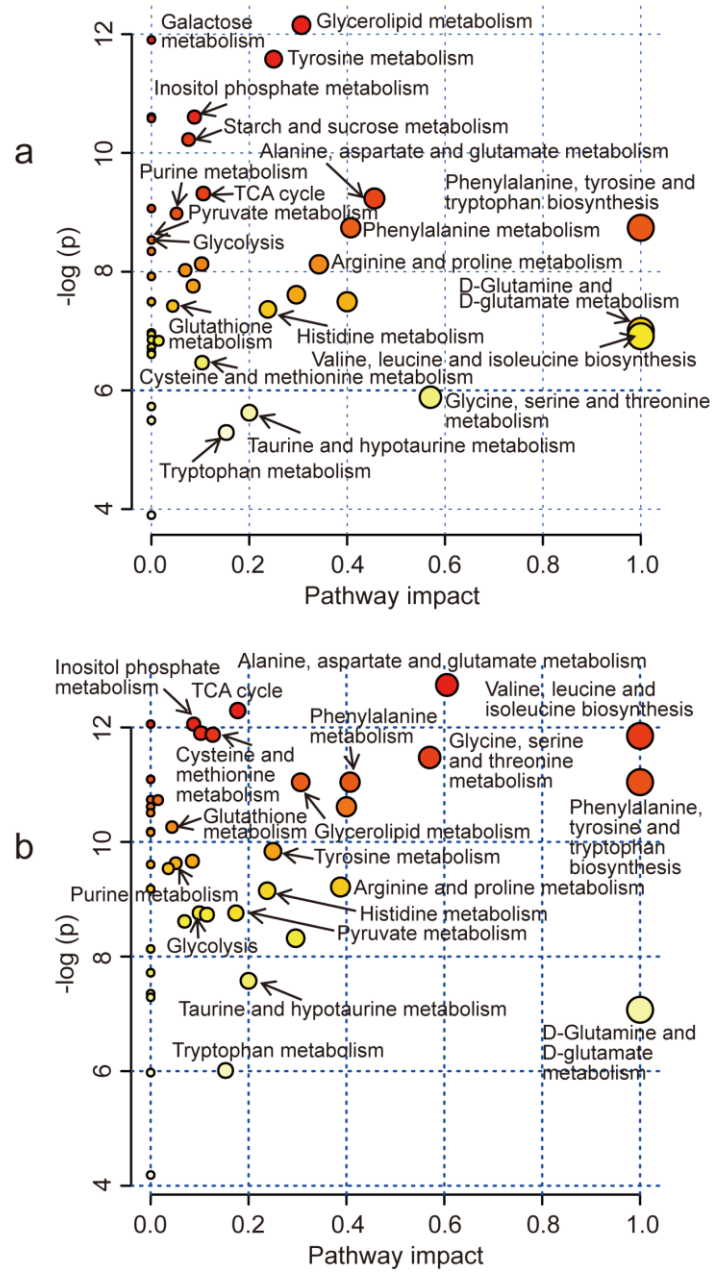

**Figure S5.** Disorders of metabolic pathways in TBF1-50 and TCF1-50 embryos in response to H-BPA exposure. **(a)** Changes in metabolic pathways in TBF1-50 embryos in response to TBBPA exposure. **(b)** Changes in metabolic pathways in TCF1-50 embryos in response to TCBPA exposure.

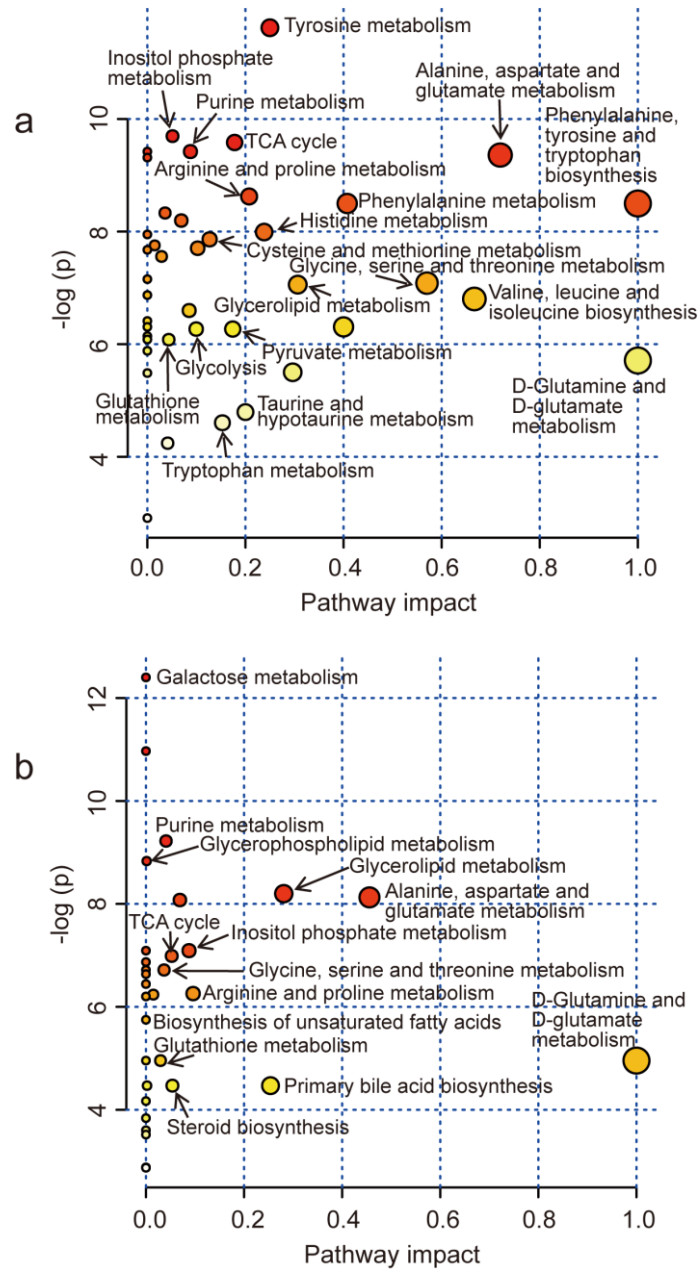

**Figure S6.** Disorders of metabolic pathways in TBF0-50 and TCF0-50 embryos in response to H-BPA exposure. **(a)** Changes in metabolic pathways in TBF0-50 embryos in response to TBBPA exposure. **(b)** Changes in metabolic pathways in TCF0-50 embryos in response to TCBPA exposure.



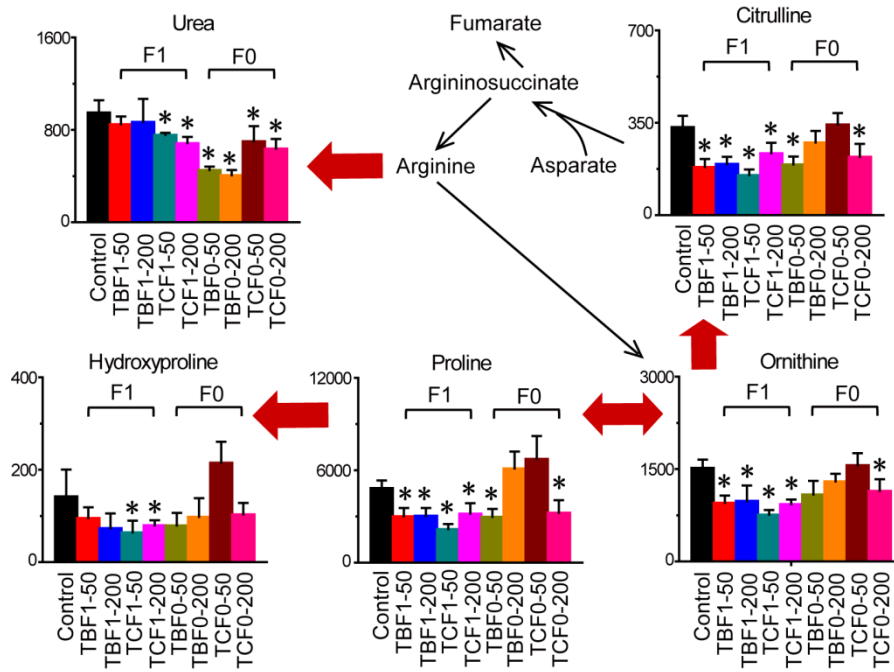

**Figure S7.** Disorders of arginine and proline metabolism in response to H-BPA exposure. Metabolite

levels are represented as the mean + sd. \*,  $p < 0.05$ ,  $n = 4$ , two-tailed Mann-Whitney U test.

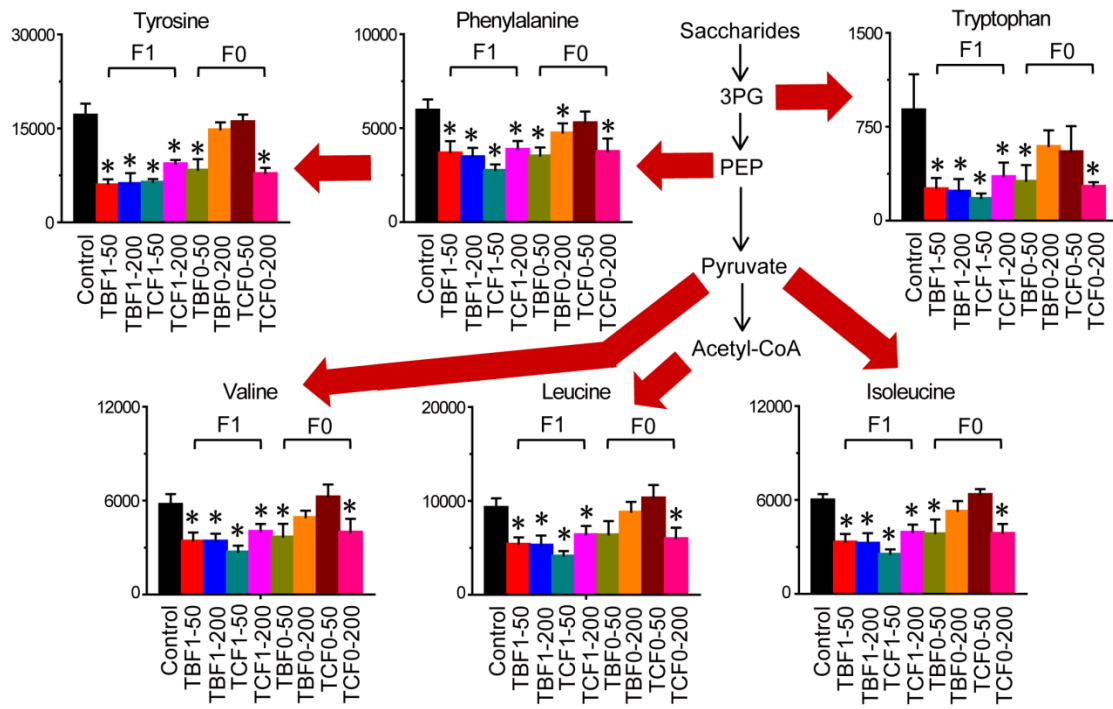

**Figure S8.** Disorders of aromatic and branched-chain amino acid metabolism in response to H-BPA exposure. Metabolite levels are represented as the mean + sd. \*,  $p < 0.05$ ,  $n = 4$ , two-tailed Mann-Whitney U test.

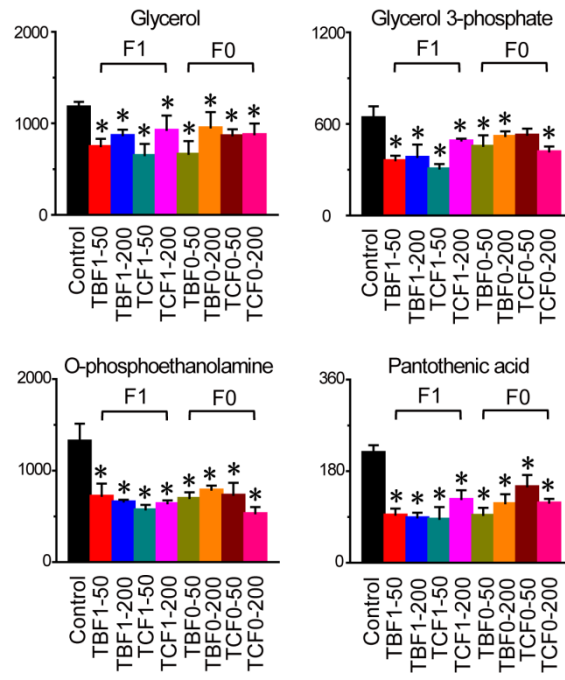

**Figure S9.** Disorders of lipid metabolism in response to H-BPA exposure. Metabolite levels are represented as the mean + sd. \*,  $p < 0.05$ ,  $n = 4$ , two-tailed Mann-Whitney U test.

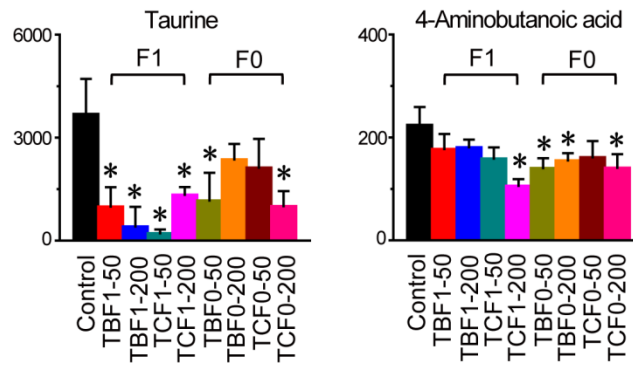

**Figure S10.** Disorders of inhibitory neurotransmitters in response to H-BPA exposure. Metabolite

levels are represented as the mean + sd. \*,  $p < 0.05$ ,  $n = 4$ , two-tailed Mann-Whitney U test.

**Table S1.** Changes in the differential metabolites in response to H-BPA exposure.

| Metabolites                         | TBF1-50/C <sup>c</sup> |             | TBF1-200/C   |             | TCF1-50/C    |             | TCF1-200/C   |             | TBF0-50/C    |             | TBF0-200/C   |             | TCF0-50/C    |             | TCF0-200/C   |             |
|-------------------------------------|------------------------|-------------|--------------|-------------|--------------|-------------|--------------|-------------|--------------|-------------|--------------|-------------|--------------|-------------|--------------|-------------|
|                                     | <i>p</i>               | Ratio       | <i>p</i>     | Ratio       | <i>p</i>     | Ratio       | <i>p</i>     | Ratio       | <i>p</i>     | Ratio       | <i>p</i>     | Ratio       | <i>p</i>     | Ratio       | <i>p</i>     | Ratio       |
| Carbohydrate metabolism             |                        |             |              |             |              |             |              |             |              |             |              |             |              |             |              |             |
| Glucose <sup>a</sup>                | 0.486                  | 0.60        | 0.057        | 0.46        | <b>0.029</b> | <b>0.33</b> | 0.057        | 0.47        | <b>0.029</b> | <b>0.28</b> | 0.686        | 0.69        | 0.343        | 0.57        | <b>0.029</b> | <b>0.49</b> |
| Fructose-6-phosphate <sup>a</sup>   | <b>0.029</b>           | <b>0.31</b> | <b>0.029</b> | <b>0.38</b> | <b>0.029</b> | <b>0.30</b> | <b>0.029</b> | <b>0.29</b> | <b>0.029</b> | <b>0.28</b> | <b>0.029</b> | <b>0.39</b> | <b>0.029</b> | <b>0.27</b> | <b>0.029</b> | <b>0.25</b> |
| Glucose-6-phosphate <sup>a</sup>    | <b>0.029</b>           | <b>0.25</b> | <b>0.029</b> | <b>0.31</b> | <b>0.029</b> | <b>0.23</b> | <b>0.029</b> | <b>0.24</b> | <b>0.029</b> | <b>0.27</b> | <b>0.029</b> | <b>0.34</b> | <b>0.029</b> | <b>0.17</b> | <b>0.029</b> | <b>0.20</b> |
| Pyruvic acid <sup>a</sup>           | <b>0.686</b>           | <b>0.70</b> | <b>0.029</b> | <b>0.61</b> | <b>0.029</b> | <b>0.32</b> | 0.114        | 0.35        | <b>0.029</b> | <b>0.46</b> | 0.686        | 0.70        | 0.686        | 0.83        | 0.200        | 1.25        |
| Lactic acid <sup>a</sup>            | <b>0.029</b>           | <b>1.98</b> | <b>0.029</b> | <b>1.56</b> | <b>0.029</b> | <b>1.43</b> | <b>0.029</b> | <b>2.76</b> | <b>0.029</b> | <b>1.65</b> | <b>0.029</b> | <b>1.46</b> | <b>0.029</b> | <b>1.32</b> | 0.057        | 1.24        |
| Fructose <sup>a</sup>               | <b>0.029</b>           | <b>0.45</b> | <b>0.029</b> | <b>0.53</b> | <b>0.029</b> | <b>0.37</b> | 0.114        | 0.80        | <b>0.029</b> | <b>0.49</b> | <b>0.029</b> | <b>0.62</b> | 0.114        | 0.76        | <b>0.029</b> | <b>0.58</b> |
| Mannose <sup>a</sup>                | <b>0.029</b>           | <b>0.38</b> | <b>0.029</b> | <b>0.39</b> | <b>0.029</b> | <b>0.32</b> | <b>0.029</b> | <b>0.28</b> | <b>0.029</b> | <b>0.25</b> | <b>0.029</b> | <b>0.40</b> | <b>0.029</b> | <b>0.30</b> | <b>0.029</b> | <b>0.34</b> |
| Mannitol <sup>a</sup>               | <b>0.029</b>           | <b>0.75</b> | <b>0.029</b> | <b>0.62</b> | <b>0.029</b> | <b>0.57</b> | 0.057        | 0.83        | <b>0.029</b> | <b>0.64</b> | <b>0.029</b> | <b>0.73</b> | <b>0.029</b> | <b>0.72</b> | <b>0.029</b> | <b>0.75</b> |
| meso-Erythritol <sup>a</sup>        | <b>0.029</b>           | <b>0.61</b> | <b>0.029</b> | <b>0.55</b> | <b>0.029</b> | <b>0.51</b> | <b>0.029</b> | <b>0.73</b> | <b>0.029</b> | <b>0.57</b> | <b>0.029</b> | <b>0.66</b> | <b>0.029</b> | <b>0.82</b> | <b>0.029</b> | <b>0.68</b> |
| Arabinitol <sup>a</sup>             | <b>0.029</b>           | <b>0.56</b> | 1.000        | 0.98        | 0.200        | 0.62        | 1.000        | 1.03        | 0.343        | 0.75        | <b>0.029</b> | <b>0.54</b> | <b>0.029</b> | <b>0.80</b> | <b>0.029</b> | <b>0.56</b> |
| Maltose <sup>a</sup>                | <b>0.029</b>           | <b>0.38</b> | 0.343        | 0.76        | <b>0.029</b> | <b>0.55</b> | 0.200        | 0.72        | 0.114        | 0.67        | 0.114        | 1.32        | 0.886        | 1.00        | 0.343        | 1.16        |
| Cellobiose <sup>a</sup>             | <b>0.029</b>           | <b>0.32</b> | 0.486        | 0.84        | 0.486        | 0.69        | 0.114        | 0.63        | 0.343        | 0.68        | 0.114        | 1.58        | 0.114        | 1.44        | 0.886        | 1.18        |
| Galactose <sup>a</sup>              | <b>0.029</b>           | <b>0.59</b> | <b>0.029</b> | <b>0.52</b> | <b>0.029</b> | <b>0.50</b> | 0.686        | 1.04        | <b>0.029</b> | <b>0.63</b> | <b>0.029</b> | <b>0.85</b> | <b>0.029</b> | <b>0.73</b> | <b>0.029</b> | <b>0.62</b> |
| Sorbitol <sup>a</sup>               | <b>0.029</b>           | <b>0.63</b> | <b>0.029</b> | <b>0.63</b> | <b>0.029</b> | <b>0.50</b> | 0.343        | 1.09        | <b>0.029</b> | <b>0.67</b> | <b>0.029</b> | <b>0.77</b> | 0.200        | 1.12        | 0.057        | 0.90        |
| Ribose <sup>a</sup>                 | <b>0.029</b>           | <b>0.45</b> | <b>0.029</b> | <b>0.52</b> | <b>0.029</b> | <b>0.42</b> | <b>0.029</b> | <b>0.37</b> | <b>0.029</b> | <b>0.47</b> | <b>0.029</b> | <b>0.75</b> | <b>0.029</b> | <b>0.72</b> | <b>0.029</b> | <b>0.56</b> |
| N-Acetyl-D-glucosamine <sup>a</sup> | <b>0.029</b>           | <b>0.38</b> | <b>0.029</b> | <b>0.31</b> | <b>0.029</b> | <b>0.33</b> | <b>0.029</b> | <b>0.45</b> | <b>0.029</b> | <b>0.37</b> | <b>0.029</b> | <b>0.50</b> | <b>0.029</b> | <b>0.57</b> | <b>0.029</b> | <b>0.45</b> |
| Ascorbic acid <sup>a</sup>          | <b>0.029</b>           | <b>0.57</b> | 0.114        | 0.60        | 0.200        | 0.73        | 0.200        | 0.82        | <b>0.029</b> | <b>0.66</b> | 0.057        | 0.69        | 0.200        | 0.82        | 0.200        | 0.80        |
| Dehydroascorbic acid <sup>a</sup>   | <b>0.029</b>           | <b>0.52</b> | <b>0.029</b> | <b>0.36</b> | <b>0.029</b> | <b>0.44</b> | <b>0.029</b> | <b>0.65</b> | <b>0.029</b> | <b>0.40</b> | <b>0.029</b> | <b>0.25</b> | <b>0.029</b> | <b>0.52</b> | <b>0.029</b> | <b>0.14</b> |
| Threonic acid <sup>a</sup>          | <b>0.029</b>           | <b>0.53</b> | <b>0.029</b> | <b>0.55</b> | 0.057        | 0.55        | <b>0.029</b> | <b>0.60</b> | 0.114        | 0.72        | 0.686        | 1.17        | 0.686        | 0.91        | 0.200        | 1.44        |
| Myo-inositol <sup>a</sup>           | <b>0.029</b>           | <b>0.49</b> | <b>0.029</b> | <b>0.52</b> | <b>0.029</b> | <b>0.43</b> | <b>0.029</b> | <b>0.59</b> | <b>0.029</b> | <b>0.48</b> | <b>0.029</b> | <b>0.69</b> | <b>0.029</b> | <b>0.75</b> | <b>0.029</b> | <b>0.60</b> |
| Maltotriose <sup>a</sup>            | <b>0.029</b>           | <b>0.42</b> | 0.057        | 0.71        | <b>0.029</b> | <b>0.58</b> | 0.114        | 0.65        | 0.057        | 0.58        | 0.886        | 1.01        | 0.686        | 0.96        | 0.200        | 0.75        |

| <b>Table S1</b> Continued.              |              |             |              |             |              |             |              |             |              |             |              |             |              |             |              |             |
|-----------------------------------------|--------------|-------------|--------------|-------------|--------------|-------------|--------------|-------------|--------------|-------------|--------------|-------------|--------------|-------------|--------------|-------------|
| Ethylene glycol <sup>b</sup>            | 0.486        | 0.92        | 0.886        | 0.97        | <b>0.029</b> | <b>0.78</b> | 0.686        | 0.97        | 0.486        | 0.93        | 1.000        | 1.02        | 0.486        | 1.09        | 0.114        | 1.16        |
| TCA cycle                               |              |             |              |             |              |             |              |             |              |             |              |             |              |             |              |             |
| Citric acid <sup>a</sup>                | <b>0.029</b> | <b>0.35</b> | <b>0.029</b> | <b>0.33</b> | <b>0.029</b> | <b>0.29</b> | <b>0.029</b> | <b>0.60</b> | <b>0.029</b> | <b>0.52</b> | <b>0.029</b> | <b>0.68</b> | 0.057        | 0.78        | <b>0.029</b> | <b>0.30</b> |
| Fumaric acid <sup>a</sup>               | <b>0.029</b> | <b>0.75</b> | <b>0.029</b> | <b>0.67</b> | <b>0.029</b> | <b>0.58</b> | 0.114        | 0.86        | <b>0.029</b> | <b>0.62</b> | <b>0.029</b> | <b>0.76</b> | <b>0.029</b> | <b>0.68</b> | <b>0.029</b> | <b>0.70</b> |
| Malic acid <sup>a</sup>                 | <b>0.029</b> | <b>0.62</b> | <b>0.029</b> | <b>0.49</b> | <b>0.029</b> | <b>0.54</b> | <b>0.029</b> | <b>0.74</b> | <b>0.029</b> | <b>0.53</b> | <b>0.029</b> | <b>0.66</b> | <b>0.029</b> | <b>0.59</b> | <b>0.029</b> | <b>0.56</b> |
| Succinic acid <sup>a</sup>              | <b>0.029</b> | <b>0.73</b> | <b>0.029</b> | <b>0.62</b> | <b>0.029</b> | <b>0.47</b> | 0.486        | 0.88        | <b>0.029</b> | <b>0.55</b> | <b>0.029</b> | <b>0.63</b> | <b>0.029</b> | <b>0.55</b> | 0.486        | 0.87        |
| 2-Hydroxyglutaric acid <sup>a</sup>     | 0.114        | 1.39        | 0.200        | 1.38        | 0.886        | 0.93        | 0.486        | 1.22        | 0.486        | 1.30        | 0.686        | 1.15        | <b>0.029</b> | <b>2.13</b> | <b>0.029</b> | <b>1.63</b> |
| Amino acid metabolism                   |              |             |              |             |              |             |              |             |              |             |              |             |              |             |              |             |
| Glycine <sup>a</sup>                    | <b>0.029</b> | <b>0.75</b> | 0.343        | 0.85        | <b>0.029</b> | <b>0.63</b> | <b>0.029</b> | <b>0.81</b> | <b>0.029</b> | <b>0.72</b> | 0.114        | 0.87        | 0.057        | 0.88        | 0.886        | 0.95        |
| Serine <sup>a</sup>                     | <b>0.029</b> | <b>0.59</b> | <b>0.029</b> | <b>0.56</b> | <b>0.029</b> | <b>0.39</b> | <b>0.029</b> | <b>0.66</b> | <b>0.029</b> | <b>0.58</b> | 0.886        | 1.02        | 0.057        | 1.15        | <b>0.029</b> | <b>0.68</b> |
| Threonine <sup>a</sup>                  | <b>0.029</b> | <b>0.75</b> | <b>0.029</b> | <b>0.71</b> | <b>0.029</b> | <b>0.49</b> | <b>0.029</b> | <b>0.74</b> | <b>0.029</b> | <b>0.71</b> | 1.000        | 1.01        | <b>0.029</b> | <b>1.34</b> | 0.343        | 0.84        |
| N,N-Dimethylglycine <sup>a</sup>        | <b>0.029</b> | <b>0.69</b> | 0.114        | 0.72        | <b>0.029</b> | <b>0.53</b> | 0.114        | 0.73        | 0.114        | 0.77        | 0.686        | 0.91        | 0.686        | 0.92        | 0.114        | 0.77        |
| Glutamic acid <sup>a</sup>              | <b>0.029</b> | <b>0.59</b> | <b>0.029</b> | <b>0.55</b> | <b>0.029</b> | <b>0.44</b> | <b>0.029</b> | <b>0.57</b> | <b>0.029</b> | <b>0.53</b> | <b>0.029</b> | <b>0.70</b> | <b>0.029</b> | <b>0.76</b> | <b>0.029</b> | <b>0.62</b> |
| Aspartic acid <sup>a</sup>              | <b>0.029</b> | <b>0.44</b> | <b>0.029</b> | <b>0.38</b> | <b>0.029</b> | <b>0.30</b> | <b>0.029</b> | <b>0.47</b> | <b>0.029</b> | <b>0.40</b> | <b>0.029</b> | <b>0.69</b> | <b>0.029</b> | <b>0.78</b> | <b>0.029</b> | <b>0.45</b> |
| Alanine <sup>a</sup>                    | 0.057        | 0.79        | 0.114        | 0.80        | <b>0.029</b> | <b>0.59</b> | <b>0.029</b> | <b>0.81</b> | <b>0.029</b> | <b>0.72</b> | 0.686        | 1.06        | 0.057        | 1.18        | 0.200        | 0.89        |
| Glutamine <sup>a</sup>                  | 0.114        | 0.67        | 0.114        | 0.68        | <b>0.029</b> | <b>0.50</b> | 0.343        | 0.78        | <b>0.029</b> | <b>0.63</b> | 0.886        | 0.94        | 0.486        | 1.09        | 0.343        | 0.76        |
| 4-Aminobutanoic acid <sup>a</sup>       | 0.114        | 0.79        | 0.114        | 0.81        | 0.057        | 0.71        | <b>0.029</b> | <b>0.47</b> | <b>0.029</b> | <b>0.63</b> | <b>0.029</b> | <b>0.69</b> | 0.057        | 0.72        | <b>0.029</b> | <b>0.63</b> |
| N-acetyl-aspartic acid <sup>a</sup>     | <b>0.029</b> | <b>0.40</b> | <b>0.029</b> | <b>0.31</b> | <b>0.029</b> | <b>0.32</b> | <b>0.029</b> | <b>0.40</b> | <b>0.029</b> | <b>0.43</b> | <b>0.029</b> | <b>0.58</b> | <b>0.029</b> | <b>0.48</b> | <b>0.029</b> | <b>0.26</b> |
| Asparagine <sup>a</sup>                 | <b>0.029</b> | <b>0.38</b> | <b>0.029</b> | <b>0.34</b> | <b>0.029</b> | <b>0.25</b> | <b>0.029</b> | <b>0.59</b> | 0.343        | 0.58        | 0.686        | 0.87        | 0.114        | 0.77        | <b>0.029</b> | <b>0.52</b> |
| Pyroglutamic acid <sup>a</sup>          | <b>0.029</b> | <b>0.61</b> | <b>0.029</b> | <b>0.60</b> | <b>0.029</b> | <b>0.46</b> | <b>0.029</b> | <b>0.66</b> | <b>0.029</b> | <b>0.65</b> | 0.200        | 0.90        | 0.486        | 0.92        | <b>0.029</b> | <b>0.75</b> |
| Pyrrolidonecarboxylic acid <sup>b</sup> | <b>0.057</b> | <b>0.67</b> | 0.057        | 0.67        | <b>0.029</b> | <b>0.56</b> | <b>0.029</b> | <b>0.64</b> | 0.200        | 0.73        | 0.486        | 1.12        | 0.200        | 1.18        | 0.200        | 0.87        |
| Proline <sup>a</sup>                    | <b>0.029</b> | <b>0.62</b> | <b>0.029</b> | <b>0.63</b> | <b>0.029</b> | <b>0.45</b> | <b>0.029</b> | <b>0.66</b> | <b>0.029</b> | <b>0.61</b> | 0.114        | 1.26        | 0.057        | 1.39        | <b>0.029</b> | <b>0.67</b> |
| Ornithine <sup>a</sup>                  | <b>0.029</b> | <b>0.63</b> | <b>0.029</b> | <b>0.65</b> | <b>0.029</b> | <b>0.50</b> | <b>0.029</b> | <b>0.61</b> | 0.057        | 0.72        | 0.057        | 0.86        | 0.886        | 1.03        | <b>0.029</b> | <b>0.75</b> |
| Citrulline <sup>a</sup>                 | <b>0.029</b> | <b>0.55</b> | <b>0.029</b> | <b>0.58</b> | <b>0.029</b> | <b>0.45</b> | <b>0.029</b> | <b>0.70</b> | <b>0.029</b> | <b>0.58</b> | 0.114        | 0.82        | 0.886        | 1.03        | <b>0.029</b> | <b>0.66</b> |
| Urea <sup>a</sup>                       | 0.200        | 0.89        | 0.686        | 0.91        | <b>0.029</b> | <b>0.80</b> | <b>0.029</b> | <b>0.72</b> | <b>0.029</b> | <b>0.48</b> | <b>0.029</b> | <b>0.43</b> | <b>0.029</b> | <b>0.74</b> | <b>0.029</b> | <b>0.67</b> |

| <b>Table S1</b> Continued.                        |              |             |              |             |              |             |              |             |              |             |              |             |              |             |              |             |
|---------------------------------------------------|--------------|-------------|--------------|-------------|--------------|-------------|--------------|-------------|--------------|-------------|--------------|-------------|--------------|-------------|--------------|-------------|
| Trans-4-hydroxyproline <sup>a</sup>               | 0.486        | 0.67        | 0.114        | 0.52        | <b>0.029</b> | <b>0.45</b> | <b>0.029</b> | <b>0.56</b> | 0.114        | 0.56        | 0.200        | 0.69        | 0.114        | 1.51        | 0.200        | 0.73        |
| Valine <sup>a</sup>                               | <b>0.029</b> | <b>0.59</b> | <b>0.029</b> | <b>0.59</b> | <b>0.029</b> | <b>0.47</b> | <b>0.029</b> | <b>0.70</b> | <b>0.029</b> | <b>0.64</b> | 0.057        | 0.86        | 0.343        | 1.08        | <b>0.029</b> | <b>0.69</b> |
| Leucine <sup>a</sup>                              | <b>0.029</b> | <b>0.58</b> | <b>0.029</b> | <b>0.57</b> | <b>0.029</b> | <b>0.45</b> | <b>0.029</b> | <b>0.69</b> | 0.057        | 0.69        | 0.486        | 0.94        | 0.486        | 1.11        | <b>0.029</b> | <b>0.64</b> |
| Isoleucine <sup>a</sup>                           | <b>0.029</b> | <b>0.55</b> | <b>0.029</b> | <b>0.54</b> | <b>0.029</b> | <b>0.42</b> | <b>0.029</b> | <b>0.66</b> | <b>0.029</b> | <b>0.64</b> | 0.200        | 0.88        | 0.114        | 1.06        | <b>0.029</b> | <b>0.65</b> |
| Phenylalanine <sup>a</sup>                        | <b>0.029</b> | <b>0.62</b> | <b>0.029</b> | <b>0.58</b> | <b>0.029</b> | <b>0.46</b> | <b>0.029</b> | <b>0.65</b> | <b>0.029</b> | <b>0.59</b> | <b>0.029</b> | <b>0.80</b> | 0.114        | 0.89        | <b>0.029</b> | <b>0.63</b> |
| Tyrosine <sup>a</sup>                             | <b>0.029</b> | <b>0.35</b> | <b>0.029</b> | <b>0.36</b> | <b>0.029</b> | <b>0.38</b> | <b>0.029</b> | <b>0.55</b> | <b>0.029</b> | <b>0.49</b> | 0.114        | 0.86        | 0.343        | 0.94        | <b>0.029</b> | <b>0.46</b> |
| Dopa <sup>a</sup>                                 | <b>0.029</b> | <b>7.53</b> | <b>0.029</b> | <b>7.44</b> | <b>0.029</b> | <b>2.79</b> | <b>0.029</b> | <b>9.50</b> | <b>0.029</b> | <b>7.47</b> | <b>0.029</b> | <b>5.03</b> | 0.057        | 2.78        | <b>0.029</b> | <b>8.03</b> |
| Tryptophan <sup>a</sup>                           | <b>0.029</b> | <b>0.29</b> | <b>0.029</b> | <b>0.27</b> | <b>0.029</b> | <b>0.20</b> | <b>0.029</b> | <b>0.40</b> | <b>0.029</b> | <b>0.36</b> | 0.114        | 0.67        | 0.114        | 0.62        | <b>0.029</b> | <b>0.31</b> |
| Methionine <sup>a</sup>                           | <b>0.029</b> | <b>0.62</b> | <b>0.029</b> | <b>0.57</b> | <b>0.029</b> | <b>0.44</b> | <b>0.029</b> | <b>0.63</b> | <b>0.029</b> | <b>0.56</b> | 0.343        | 0.84        | 0.686        | 1.00        | <b>0.029</b> | <b>0.58</b> |
| Lysine <sup>a</sup>                               | <b>0.029</b> | <b>0.51</b> | <b>0.029</b> | <b>0.57</b> | <b>0.029</b> | <b>0.40</b> | <b>0.029</b> | <b>0.62</b> | <b>0.029</b> | <b>0.59</b> | 0.200        | 0.86        | 0.886        | 0.99        | <b>0.029</b> | <b>0.64</b> |
| N-acetyl-lysine <sup>b</sup>                      | <b>0.029</b> | <b>0.50</b> | <b>0.057</b> | <b>0.52</b> | <b>0.029</b> | <b>0.38</b> | <b>0.029</b> | <b>0.61</b> | 0.057        | 0.62        | 0.343        | 0.81        | 0.343        | 0.84        | <b>0.029</b> | <b>0.63</b> |
| Histidine <sup>b</sup>                            | <b>0.029</b> | <b>0.31</b> | <b>0.029</b> | <b>0.35</b> | <b>0.029</b> | <b>0.27</b> | <b>0.029</b> | <b>0.44</b> | <b>0.029</b> | <b>0.36</b> | 0.486        | 0.81        | 1.000        | 0.99        | 0.057        | 0.43        |
| Mimosine <sup>a</sup>                             | <b>0.029</b> | <b>0.81</b> | <b>0.029</b> | <b>0.85</b> | <b>0.029</b> | <b>0.74</b> | <b>0.029</b> | <b>0.60</b> | 0.686        | 0.96        | 0.886        | 0.97        | <b>0.029</b> | <b>0.74</b> | <b>0.029</b> | <b>0.74</b> |
| Pantothenic acid <sup>a</sup>                     | <b>0.029</b> | <b>0.43</b> | <b>0.029</b> | <b>0.41</b> | <b>0.029</b> | <b>0.40</b> | <b>0.029</b> | <b>0.58</b> | <b>0.029</b> | <b>0.43</b> | <b>0.029</b> | <b>0.54</b> | <b>0.029</b> | <b>0.69</b> | <b>0.029</b> | <b>0.54</b> |
| Taurine <sup>b</sup>                              | <b>0.029</b> | <b>0.27</b> | <b>0.029</b> | <b>0.11</b> | <b>0.029</b> | <b>0.06</b> | <b>0.029</b> | <b>0.36</b> | <b>0.029</b> | <b>0.32</b> | 0.114        | 0.64        | 0.114        | 0.58        | <b>0.029</b> | <b>0.27</b> |
| Lipid metabolism                                  |              |             |              |             |              |             |              |             |              |             |              |             |              |             |              |             |
| Hexanoic acid <sup>a</sup>                        | 1.000        | 0.94        | 0.057        | 0.66        | <b>0.029</b> | <b>0.46</b> | 0.343        | 0.79        | 0.200        | 1.18        | 0.343        | 1.13        | 0.686        | 1.07        | 0.886        | 1.05        |
| Myristic acid <sup>a</sup>                        | <b>0.029</b> | <b>0.84</b> | 0.057        | 0.88        | <b>0.029</b> | <b>0.83</b> | 0.114        | 0.87        | 0.057        | 0.81        | 0.057        | 0.88        | 0.114        | 0.90        | <b>0.029</b> | <b>0.83</b> |
| Heptadecanoic acid <sup>a</sup>                   | 0.486        | 0.95        | 0.200        | 0.91        | 0.114        | 0.87        | 0.057        | 0.90        | <b>0.029</b> | <b>0.86</b> | 0.057        | 0.88        | 0.114        | 0.89        | 0.886        | 0.98        |
| Oleic acid <sup>a</sup>                           | 0.200        | 0.93        | 0.343        | 1.05        | 0.343        | 0.94        | 0.114        | 0.87        | 1.000        | 1.00        | 0.686        | 0.98        | <b>0.029</b> | <b>0.84</b> | 0.686        | 1.03        |
| Trans-9-octadecenoic acid <sup>a</sup>            | 0.343        | 0.91        | 1.000        | 1.02        | 0.343        | 0.94        | 0.114        | 0.90        | 0.343        | 0.92        | 0.114        | 0.89        | <b>0.029</b> | <b>0.79</b> | 0.343        | 0.94        |
| Linoleic acid <sup>a</sup>                        | 0.200        | 0.86        | 1.000        | 1.03        | 0.886        | 0.95        | <b>0.029</b> | <b>0.73</b> | 0.886        | 0.94        | 1.000        | 0.96        | 0.057        | 0.77        | 1.000        | 1.02        |
| 5,8,11,14,17-Eicosapentaenoic acid <sup>a</sup>   | 0.886        | 1.01        | 0.114        | 1.17        | 0.114        | 1.14        | 0.686        | 0.96        | 0.686        | 0.95        | 0.686        | 1.02        | <b>0.029</b> | <b>0.83</b> | 0.057        | 1.25        |
| 4,7,10,13,16,19-Docosahexaenoic acid <sup>a</sup> | 0.686        | 1.04        | <b>0.029</b> | <b>1.39</b> | 0.057        | 1.17        | 1.000        | 1.01        | 0.200        | 0.93        | 0.200        | 0.92        | <b>0.029</b> | <b>0.71</b> | 0.057        | 1.11        |
| Monosteari <sup>a</sup>                           | 0.686        | 0.94        | 0.343        | 1.23        | 0.343        | 1.04        | <b>0.029</b> | <b>0.74</b> | 0.200        | 0.90        | 1.000        | 1.00        | 0.686        | 0.94        | 0.886        | 1.03        |

| <b>Table S1</b> Continued.             |              |             |              |             |              |             |              |             |              |             |              |             |              |             |              |             |
|----------------------------------------|--------------|-------------|--------------|-------------|--------------|-------------|--------------|-------------|--------------|-------------|--------------|-------------|--------------|-------------|--------------|-------------|
| Ethanolamine <sup>a</sup>              | 0.686        | 0.95        | <b>0.029</b> | <b>1.55</b> | 0.486        | 1.14        | 0.343        | 0.90        | 0.343        | 1.17        | 0.200        | 1.19        | <b>0.029</b> | <b>1.33</b> | 0.200        | 1.43        |
| O-phosphoethanolamine <sup>a</sup>     | <b>0.029</b> | <b>0.55</b> | <b>0.029</b> | <b>0.50</b> | <b>0.029</b> | <b>0.43</b> | <b>0.029</b> | <b>0.48</b> | <b>0.029</b> | <b>0.53</b> | <b>0.029</b> | <b>0.60</b> | <b>0.029</b> | <b>0.56</b> | <b>0.029</b> | <b>0.40</b> |
| Glycerol <sup>a</sup>                  | <b>0.029</b> | <b>0.63</b> | <b>0.029</b> | <b>0.74</b> | <b>0.029</b> | <b>0.55</b> | <b>0.029</b> | <b>0.79</b> | <b>0.029</b> | <b>0.56</b> | <b>0.029</b> | <b>0.81</b> | <b>0.029</b> | <b>0.73</b> | <b>0.029</b> | <b>0.75</b> |
| Glycerol 3-phosphate <sup>a</sup>      | <b>0.029</b> | <b>0.56</b> | <b>0.029</b> | <b>0.60</b> | <b>0.029</b> | <b>0.48</b> | <b>0.029</b> | <b>0.76</b> | <b>0.029</b> | <b>0.71</b> | <b>0.029</b> | <b>0.81</b> | 0.114        | 0.82        | <b>0.029</b> | <b>0.65</b> |
| Cholesterol <sup>a</sup>               | 0.343        | 0.91        | 0.886        | 0.95        | 0.486        | 0.90        | 0.486        | 0.84        | 0.686        | 0.95        | 0.343        | 0.93        | <b>0.029</b> | <b>0.72</b> | 0.886        | 0.96        |
| Dihydrocholesterol <sup>b</sup>        | <b>0.029</b> | <b>0.81</b> | 0.057        | 0.89        | 0.057        | 0.84        | 0.057        | 0.77        | 0.114        | 0.91        | 0.057        | 0.88        | <b>0.029</b> | <b>0.67</b> | 0.486        | 0.93        |
| Nucleoside metabolism                  |              |             |              |             |              |             |              |             |              |             |              |             |              |             |              |             |
| Hypoxanthine <sup>a</sup>              | <b>0.029</b> | <b>0.31</b> | <b>0.029</b> | <b>0.28</b> | <b>0.029</b> | <b>0.26</b> | <b>0.029</b> | <b>0.26</b> | <b>0.029</b> | <b>0.34</b> | 0.057        | 0.65        | 0.057        | 0.59        | <b>0.029</b> | <b>0.40</b> |
| Uric acid <sup>a</sup>                 | <b>0.029</b> | <b>0.40</b> | <b>0.029</b> | <b>0.31</b> | <b>0.029</b> | <b>0.32</b> | <b>0.029</b> | <b>0.21</b> | <b>0.029</b> | <b>0.31</b> | <b>0.029</b> | <b>0.38</b> | <b>0.029</b> | <b>0.41</b> | <b>0.029</b> | <b>0.21</b> |
| Inosine <sup>a</sup>                   | <b>0.029</b> | <b>0.17</b> | <b>0.029</b> | <b>0.24</b> | <b>0.029</b> | <b>0.24</b> | <b>0.029</b> | <b>0.37</b> | <b>0.029</b> | <b>0.25</b> | <b>0.029</b> | <b>0.09</b> | <b>0.029</b> | <b>0.12</b> | <b>0.029</b> | <b>0.15</b> |
| Adenine <sup>a</sup>                   | <b>0.029</b> | <b>0.66</b> | <b>0.029</b> | <b>0.58</b> | <b>0.029</b> | <b>0.56</b> | <b>0.029</b> | <b>0.52</b> | <b>0.029</b> | <b>0.66</b> | 0.486        | 0.96        | <b>0.029</b> | <b>0.84</b> | <b>0.029</b> | <b>0.35</b> |
| Others                                 |              |             |              |             |              |             |              |             |              |             |              |             |              |             |              |             |
| Alpha-Tocopherol <sup>a</sup>          | 0.486        | 0.89        | 0.886        | 1.01        | 1.000        | 1.01        | 0.057        | 0.81        | 0.486        | 0.91        | <b>0.029</b> | <b>0.77</b> | <b>0.029</b> | <b>0.61</b> | 0.114        | 0.78        |
| Monomethylphosphoric acid <sup>a</sup> | 0.057        | 0.78        | 0.057        | 0.79        | <b>0.029</b> | <b>0.70</b> | 0.057        | 0.78        | 0.343        | 0.91        | 0.686        | 0.95        | 0.114        | 0.75        | 0.114        | 0.75        |
| Hydroxylamine <sup>b</sup>             | 0.686        | 1.13        | 0.057        | 1.44        | <b>0.029</b> | <b>1.43</b> | 0.200        | 1.30        | 0.686        | 0.97        | 0.686        | 0.88        | 1.000        | 1.01        | 1.000        | 1.00        |
| Phosphate <sup>a</sup>                 | <b>0.029</b> | <b>0.76</b> | <b>0.029</b> | <b>0.76</b> | <b>0.029</b> | <b>0.68</b> | <b>0.029</b> | <b>0.78</b> | <b>0.029</b> | <b>0.83</b> | <b>0.029</b> | <b>0.81</b> | <b>0.029</b> | <b>0.77</b> | <b>0.029</b> | <b>0.58</b> |

<sup>a</sup> Identified by library search and further verified by standard references according to the mass spectral, retention time and retention index. <sup>b</sup> Identified by library search

according to the mass spectral. <sup>c</sup> C, the control group. The two-tailed Mann-Whitney U test was performed to evaluate the significant level between the control and treatment

groups. Bold red fonts: metabolites were significantly increased in the treatment group compared to the control group; Bold blue fonts: metabolites were significantly

decreased in the treatment group compared to the control group. Raw peak table of the metabolites were provided in Table S2.
